# Supplementary material for: Depression-like phenotype by deletion of α7 nicotinic acetylcholine receptor: Role of BDNF-TrkB in nucleus accumbens
Source: PubMed Central journal article supplement (PMC5099687; doi:10.1038/srep36705), 2016-11-08

## Supplemental figure legends and figures

### **Depression-like phenotype by deletion of $\alpha 7$ nicotinic acetylcholine receptor: Role of BDNF-TrkB in nucleus accumbens**

Ji-chun Zhang, Wei Yao, Qian Ren, Chun Yang, Chao Dong, Min Ma,  
Jin Wu and Kenji Hashimoto

Division of Clinical Neuroscience, Chiba University Center for Forensic Mental Health, Chiba 260-8670, Japan

Correspondence: Kenji Hashimoto, Division of Clinical Neuroscience, Chiba University Center for Forensic Mental Health, 1-8-1 Inohana, Chiba 260-8670, JAPAN.

#### **Supplemental figure legends**

##### **Supplemental figure 1: The western blot of proteins in the selected brain regions from $\alpha 7$ nAChR WT and KO mice.**

(a): The blots for proBDNF, BDNF and actin.

(b): The blots for p-TrkB and TrkB.

(c): The blots for GluA1, PSD-95 and actin.

The red line marked blots were selected in the figure 2.

##### **Supplemental figure 2: The western blot of proteins in the NAc from $\alpha 7$ nAChR WT and KO mice after ANA-12 injection.**

(a): The blots for proBDNF, BDNF and actin in the NAc after i.p. injection of ANA-12.

(b): The blots for p-TrkB, TrkB and actin in the NAc after i.p. injection of ANA-12.

(c): The blots for GluA1, PSD-95 and actin in the NAc after i.p. injection of ANA-12.

(d): The blots for proBDNF, BDNF, and actin in the NAc after bilateral injection of ANA-12 into the NAc.

(e): The blots for p-TrkB, TrkB and actin in the NAc after bilateral injection of ANA-12 into the NAc.

(f): The blots for GluA1, PSD-95 and actin in the NAc after bilateral injection of ANA-12 into the NAc.

The red line marked blots were selected in the figure 4 and figure 6.

## Supplemental figure 1

### a. For figure 2a and b

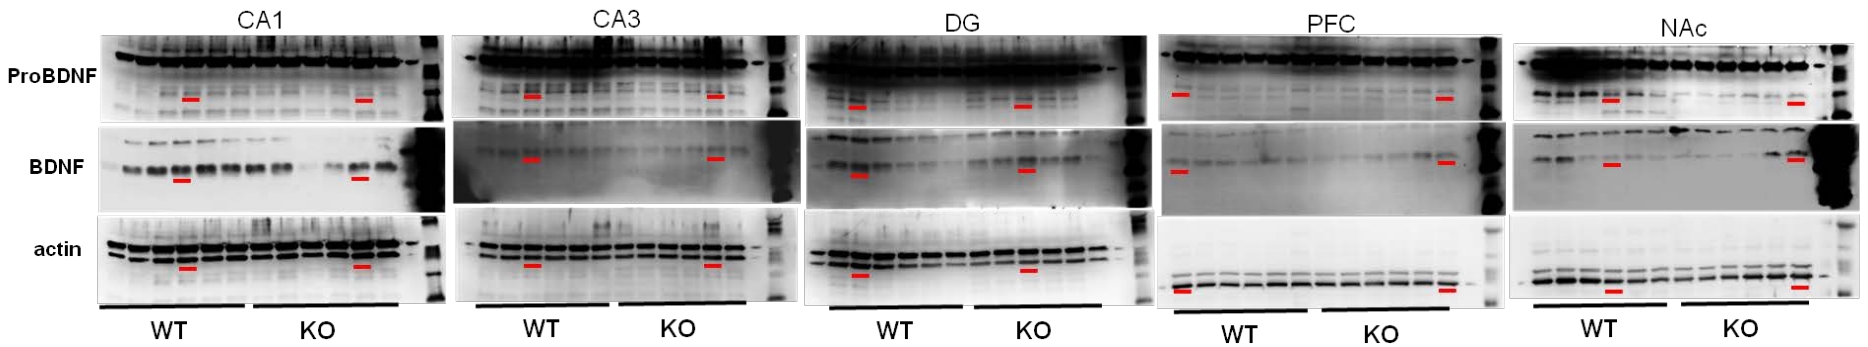

### b. For figure 2c

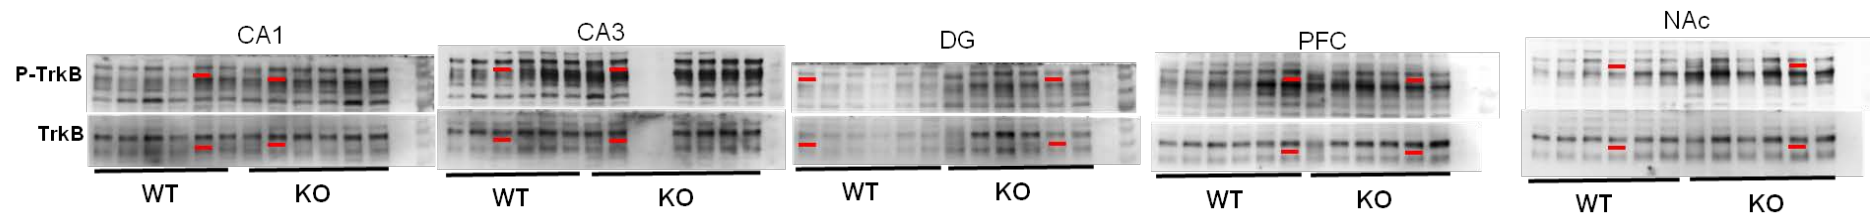

### c. For figure 2d and e

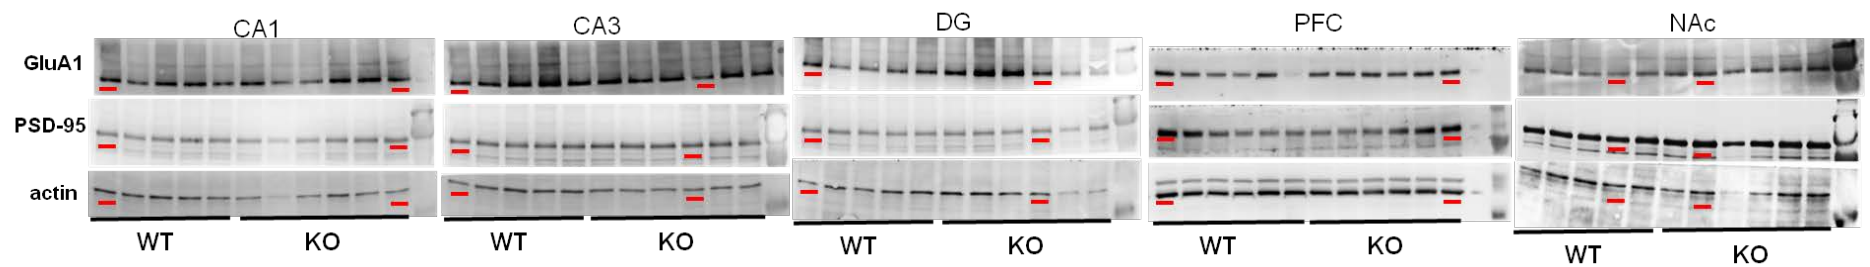

## Supplemental figure 2

a. For figure 4e

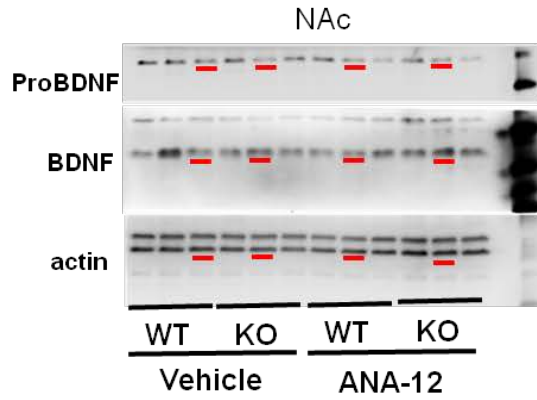

b. For figure 4g

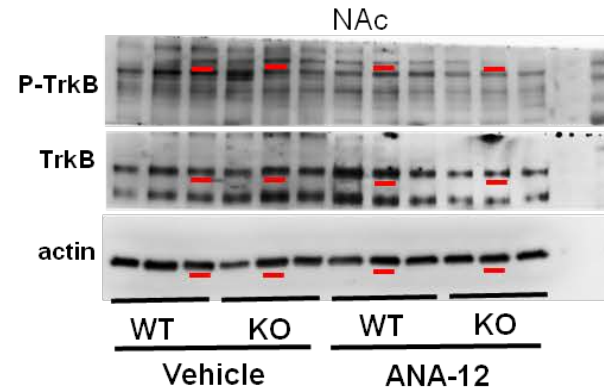

c. For figure 4h and i

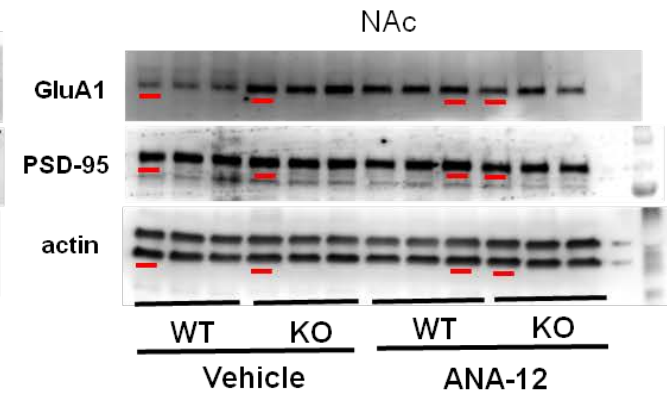

d. For figure 6f and g

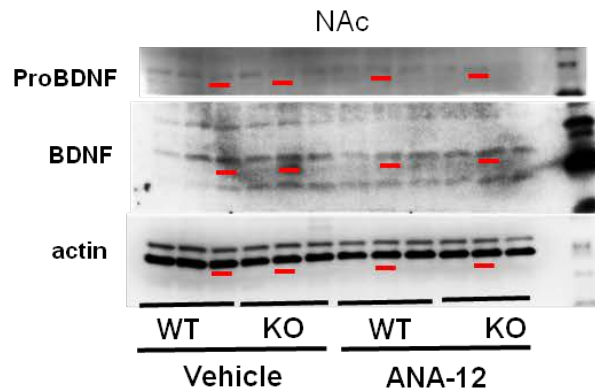

e. For figure 6h

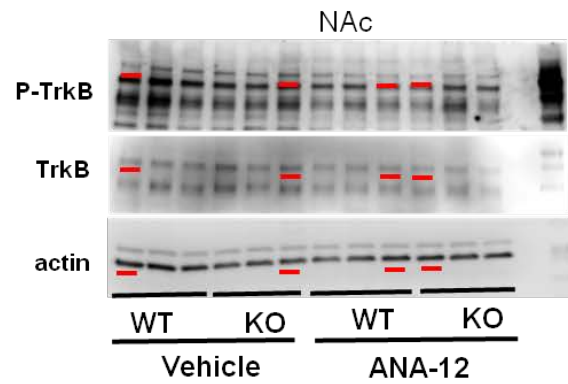

f. For figure 6i and j

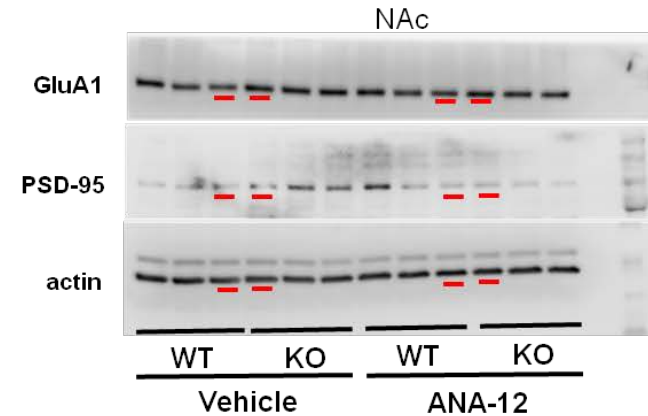

Supplement: srep36705-s1.pdf [file srep36705-s1.pdf]
